# Supplementary material for: New Genes in the Drosophila Y Chromosome: Lessons from D. willistoni
Source: MDPI journal article supplement (doi:10.3390/genes12111815), 2021-11-18
Supplement: s1 [file s1]

Article

# New genes in the *Drosophila* Y chromosome: lessons from *D. willistoni*

João Ricchio <sup>1</sup>, Fabiana Uno <sup>1</sup> and A. Bernardo Carvalho <sup>1,\*</sup>

<sup>1</sup> Departamento de Genética, Instituto de Biologia, Universidade Federal do Rio de Janeiro, Brazil; rosaricchio@gmail.com (J.R.); fabi.uno@gmail.com (F.U.); bernardo1963@gmail.com (A.B.C.)

\* Correspondence: bernardo1963@gmail.com

## Supplementary Materials

The Supplementary Material is composed of:

- This file, containing text, three Supplementary Figures and eighth Supplementary Tables (pdf).
- The spreadsheet file YGS\_results.xlsx (Excel).
- The wilYgenes\_25oct2021\_cds.fasta file, containing the sequence of the annotated genes (plain text).
- The R script file Poisson\_regression.R (plain text).
- The R data file AF\_vir\_mel\_wil\_data.txt (plain text).
- The R data file AF\_vir\_mel\_wil\_conservative\_data.txt (plain text).

## Annotation of *D. willistoni* Y-linked genes

Here we detail the annotation of the 14 new Y-linked genes we found. As we commented in the main text at least a small part of each of them has been previously annotated using computational pipelines, and we choose to keep the original gene names. Given these previous efforts, it is desirable to clarify here the contributions of the present manuscript. Currently there are three computational annotations. The first was done when the *D. willistoni* genome was sequenced in ~2005 [1], and later updated by FlyBase. Around 2010 FlyBase stopped updating the gene annotations of "non-melanogaster species", and NCBI assumed this task. Finally, Yang *et al.* [2] reannotated eight *Drosophila* genomes, including *D. willistoni*. The last two annotation efforts made extensive use of Illumina RNAseq data which was not available when the first annotation was done, and in general are more complete and precise. There are two broad limitations in these previous annotation efforts. First, none of the 14 genes was recognized before as a Y-linked gene. Second, in the three previous annotations the sequence of the 14 genes is incomplete for more than half of the genes (Table S7), partly because these annotations were completely automatic, *i.e.*, there was no manual curation. We addressed the above problems as follows.

Regarding Y-linkage, as described in the main text, we used a computational method [3] to detect candidate Y-linked sequences, and experimentally confirmed it with PCR for all 14 genes.

The second problem is quite common in Y-linked genes. The culprit is the huge size of the introns, which causes assembly fragmentation: exons of the same gene end up scattered in different scaffolds. All three computational pipelines mentioned above are strictly based on the genome sequence, even when they use RNAseq data. Hence, the genes that were fragmented in the genome assembly are also fragmented in the annotation. For example, the exons of the complete *GK27406* gene are scattered in three scaffolds in the reference Sanger genome assembly (CH962205, CH968469, and CH964169), and each part

was annotated as a different gene in Clark *et al.* [1] (GK18657, GK27211, and GK27406, respectively). A similar result is present in the annotation done by Yang *et al.* [2], and NCBI annotated just one of the partial sequences. Besides the fragmentation issue, some exons are missing in the genome assembly, and were not annotated. We addressed these problems by manually annotating these genes using TblastN (which frequently retrieves the scattered exons), followed by RT-PCR or *de novo* assembly of RNAseq reads to demonstrate that the scattered exons belong to the same transcription unit, and to close the gaps, as described in ref. [4]. The above methods work well for single-copy genes, or genes with two copies. The annotation of multi-copy genes presented some specific challenges, as detailed below.

### Annotation of multicopy genes GK20618 / GK20619, and GK18510.

GK20618 / GK20619 encodes a  $\beta 6$  subunit of the proteasome. *D. melanogaster* harbors only one copy of the *Pros $\beta 6$*  gene, which has widespread expression, whereas there are seven paralogs in *D. willistoni* (Fig S1 and Table S3). Three of them are autosomal: GK20318 (which has widespread expression) and the testis-specific GK16137 and YOgnWI012342. The duplication of proteasome subunit genes originating testis-specific paralogs is common in *Drosophila* species, and was noticed by Belote and Zhong [5] in many of them, including *D. willistoni*. In *D. willistoni* the testis-specific YOgnWI012342 further duplicated to the Y chromosome and once there, additional duplications originated a total of four genes. They are all very similar (98% identity between the Y-linked genes and the autosomal YOgnWI012342; 99% among the Y-linked genes), which may cause misassemblies. Indeed, the four Y-linked copies are present only in the PacBio assembly. The Sanger assembly, which is the genome reference used in the available gene annotations [1,2], contains only two Y-linked copies, GK20618 and GK20619, which are identical to two PacBio copies. Finally, there is one Y-linked pseudogene in the Sanger assembly (GK22295) and three in the PacBio assembly. Even though we cannot directly compare these results with the ones obtained with the Nanopore assembly, as it came from a different strain, we saw a similar pattern there: three functional Y-linked copies and two Y-linked pseudogenes. While we are fairly confident that the *D. willistoni* Y-linked copies of *Pros $\beta 6$*  are functional, the above results must be taken cautiously. Highly similar gene copies are prone to misassemblies with smaller reads such as Illumina and Sanger, but they can also occur with long reads [6]. All evidence of gene functionality (intactness of coding region; gene expression) relies on the correctness of the assembled genome, and more detailed studies are needed to confirm that (*e.g.*, ref. [6]).

The second multi-copy gene with difficult annotation was GK18510, which encodes a sperm protamine. It looks simple in the Sanger assembly: two Y-linked copies (scaffolds CH971205 and CH968555), and one annotated transcript (GK18510, from the first scaffold). But there are ~ 20 copies in the PacBio and Nanopore assemblies, some complete, some fragmented, and none of them perfectly match the GK18510 sequence. Hence, the current sequence of GK18510 most likely represents collapsed copies of the Y-linked sequences, *i.e.*, it is misassembled. Given the many copies and their fragmented state, the PacBio and Nanopore assemblies may also have misassemblies in this multicopy gene. All the caveats mentioned above for the *Pros $\beta 6$*  genes apply much more strongly to GK18510, and its classification as a functional gene should be seen as tentative.

### Statistical test of gene gains and gene losses

Here we investigate the rates of gene gain and gene loss in the *D. willistoni* lineage, and compare it with previous results from two other species. We did this with the "Assumption-free" method described in ref. [3], which can only be used with Y chromosomes with well known gene content, such that both gene losses and gene gains were identified. Koerich *et al.* 2008 [7] and Carvalho and Clark 2013 [3] also used two other methods ("Homogeneous Gain Loss" and "Approximate Bayesian Computation") which are specially

helpful when Y-linked gene content is well known in only one species. As we now have three species with well known gene content of the Y (*D. virilis* [3], *D. melanogaster* [7], and *D. willistoni* (this paper)), we applied the "Assumption-free" method, which is simpler. We have not included *D. pseudoobscura* and related species because in this lineage the entire Y chromosome became part of an autosome [8]. This should not be confounded with an event of gene loss, in the same way that the neo-Y formation in *D. miranda* [9] should not be confounded with gene gain events. These chromosome-wide events have different causes and consequences from the individual gene gains and losses, which we are dealing with in the current paper.

The gene gains and losses in the three species phylogeny are shown in Figure S3, and the divergence times were taken from ref. [10]. There are fairly large uncertainties in these divergence times, but we are interested in the gain-loss ratio, which is not affected by these uncertainties (they cancel out in the gain-loss ratio; see ref. [7] for details). We implemented the statistical procedures, which are based on Poisson regression, in R language [11]. They test the null hypothesis of a gain-loss ratio of 1 (see refs. [3,7] for details). The R script and the input data files are in the Supplementary files *Poisson\_regression.R* and *AF\_vir\_mel\_wil\_data.txt*, respectively.

We found a gene gain / gene loss ratio of 25.0 ( $P = 0.002$ , Poisson regression; 95% confidence interval: 3.4 - 184.5). Previous studies have shown that the gain-loss ratio is significantly larger than 1 in both *D. melanogaster* and *D. virilis* branches [3,7], and the same obviously is true in the *D. willistoni* branch, which has more gene gains than these species, and no gene loss. The Poisson regression also tests the goodness-of-fit of the model to the data, which here tests the heterogeneity of gain-loss ratio in the branches shown in Figure S3. We found a statistically significant heterogeneity ( $P = 0.006$ ). Thus, it seems that the preponderance of gene gains over gene losses is a general phenomenon in *Drosophila*, and that its magnitude is variable across the phylogeny.

The same qualitative results are obtained if we adopt a more conservative interpretation of the *D. willistoni* results, by excluding the very recent three gene gains which have nearly identical copies in the autosomes (the genes are *GK18510*, *GK20591*, and *CG34175*), on the grounds that it is less certain that they will not become pseudogenes. In this case we found a gene gain / gene loss ratio of 21.0 ( $P = 0.003$ , Poisson regression; 95% confidence interval: 2.8 - 156.1), and a statistically significant heterogeneity ( $P = 0.02$ ).

**Table S1.** Illumina datasets. All reads came from the reference strain of *D. willistoni* (14030-0811.24).

| Accession                | Source                         |
|--------------------------|--------------------------------|
| SRR9426110               | adult male DNA                 |
| SRR9426117               | adult female DNA               |
| SRR15992681, SRR15992682 | adult male accessory gland RNA |
| SRR15992683, SRR15992684 | adult female ovary RNA         |
| SRR15992685, SRR15992686 | adult male testis RNA          |
| SRR5639520, SRR7243441   | adult male whole body RNA      |
| SRR5639514, SRR7243435   | adult male thorax RNA          |
| SRR5639502, SRR7243423   | adult male head RNA            |
| SRR5639517, SRR7243438   | adult female whole body RNA    |
| SRR5639511, SRR7243432   | adult female thorax RNA        |
| SRR5639499, SRR7243420   | adult female head RNA          |

**Table S2.** PCR primers used to test for Y-linkage in *D. willistoni* and other species.

| Target gene | Forward primer                                  |                                            | Reverse primer                                  |                                         |
|-------------|-------------------------------------------------|--------------------------------------------|-------------------------------------------------|-----------------------------------------|
| CG34277     | RCCC_F1                                         | CAATCTTCTGGAAGACCAATGATGMRNTGYWSNTG        | AVVA_R1                                         | ACCTCCTATACCTTGTATTTTACCAMGNYGNTGNCG    |
| CG34277     | CG34277_F10 ACCAAGGATTCCGCTGCCATTA              |                                            | CG34277_R10 GTGTGAAGCGAGGATGAT                  |                                         |
| CG6052      | VWDY_F1                                         | TGTTCTTATTGGATGTCTCARTGGGTNTGGGAYTA        | MAI_R1                                          | GGTTATGTAAAAATAAACAGGTCTTTAGTAHTANCGHTA |
| CG6052      | VVDS_F2                                         | GAAGAACGAAATCAAATGCCAYTNRTNGTNGA           | MAI_R2                                          | GGTTATGTAAAAATAAACAGGTCTTTAGTAHTANCGHTA |
| CG6052      | CG6052_F10 GCCATTGGTAGTGGACTCGATTAGTA           |                                            | CG6052_R10 ATTTTCAGTATTAATCCCTTGGAGTAA          |                                         |
| CG32650     | EQNH_F1                                         | TGGATTCAATTCTAAATATCTACAAATGGARCANAAYCA    | FDWD_R1                                         | TAAGCTAAAACAGCTAGGGTYAGYTT              |
| CG32650     | CG32650_F10 AGTATGTTTTCGCAATTTAGGAGA3           |                                            | CG32650_R10 CAAGAAACAACGGTGATGGT                |                                         |
| Ran-like    | RAN_F10                                         | AGTGTTTATTGCTTGGAGA                        | RAN_R10                                         | AGGAGAAGTATAGCCACATCAAG                 |
| Pzl         | PZL_F10                                         | AAACTTTGCTGATTGGATG                        | PZL_R10                                         | GGGGGAAAGTTCAATAAGT                     |
| CG15580     | CG15580_F10 GGGTGTTAGCCTCAAGTATGTG              |                                            | CG15580_R10 CACACCTCATTGGCCACTATTTCT            |                                         |
| CG34175     | CG34175_F10 TAATCCATTTTACATAGGTCCCAATCCACCGCAAT |                                            | CG34175_R10 TTACGTTCTGGCTACTTGGACGGCAATTGTAA    |                                         |
| CG14740     | CG14740_F10 TATATTTTACCGGGGCATGACGCTCAAGGAT     |                                            | CG14740-R10 ACTCTCGAGATCCAGCACCGTCCTTAAATGCATTG |                                         |
| CG14718     | CG14718-F10 TTGTTATTGGGCAGAAGCAGCTACTGTGGATTCC  |                                            | CG14718-R10 ACTCAGACGCATGCCCAGCACAAAGATCGC      |                                         |
| CG6888      | CG6888-F10 CTAACCGAGTTTCGTGGTCGTTATGTGGTGC      |                                            | CG6888-R10 TTATTGAGCATTTTTAAAGTAATCATCT         |                                         |
| CG6888      | CG6888-F11 ACATGCGTTCAGCGATCGGGCCAGGAATTCA      |                                            | CG6888-R11 ACCGAATCATCGCTGAAGTGAACGCCTGA        |                                         |
| CG10588     | CG10588_F10 SEQUENCE GAAATTCAATACCGCACTAA       |                                            | CG10588_R10 ATCCATTAAACATTCACTCC                |                                         |
| CG10588     | CG10588_WRKY_F1                                 | CATGAAGCTCTACATGATTTTTGGMRNAARTA           | CG10588_VLPP_R1                                 | CCAAATCAAGCTATTACTTTAAAGTAACSNCCNTYNTG  |
| CG10588     | CG10588_DNVQ_F2                                 | TTTCAAGTTGAACTACCATTATGGAYAAAYGYNCA        | CG10588_TLHW_R2                                 | CCAAAAGGAACAACACTACGGTYWYNTYNCA         |
| CG13539     | CG13539_DDRL_F1                                 | ATTCATGGTCATCTACAATAATGGAYGANMGNYT         | CG13539_FNCM_R1                                 | CTTGATCTTTTAATTTACCACGTAAGTHYGYAAYTT    |
| CG13539     | CG13539_NCST_F2                                 | CTACAAACTATGAAAATTATTAAACGAATGAAYTGYWSNAC  | CG13539_TASV_R2                                 | TTGTAACCTCAATCAAATCGTCTGGTTTRNSWNCGNCA  |
| CG13539     | CG13539_MKRH_F3                                 | AGATGCTATTCCAGATATTTATTTTCATCTAHTNAARMGNCA | CG13539_PQYY_R3                                 | AGGTCCACCTATTAGAGGTTTTATYATRACNCC       |
| CG13539     | CG13539_F10 AGAAAATTGCAAAAACCTGGA               |                                            | CG13539_R10 TTTTACGAGACATGCTACAATC              |                                         |

**Table S3.** Expression (in fpkm) of *Prosβ6* gene family in *D. willistoni*.

| Sample            | GK20318 | GK16137 | YOgnWI012342 | GK20618 | GK20619 | GK22295 |
|-------------------|---------|---------|--------------|---------|---------|---------|
| male whole body   | 242.8   | 15.6    | 33.2         | 52.5    | 48.5    | 0.0     |
| testis            | 329.5   | 103.5   | 232.7        | 621.2   | 562.9   | 9.1     |
| accessory gland   | 335.7   | 0.0     | 0.3          | 0.8     | 0.1     | 0.0     |
| male thorax       | 108.7   | 0.1     | 0.7          | 1.7     | 0.6     | 0.0     |
| male head         | 156.6   | 0.2     | 1.2          | 0.5     | 0.0     | 0.3     |
| female whole body | 453.6   | 0.0     | 0.0          | 0.0     | 0.0     | 0.0     |
| ovary             | 459.9   | 0.0     | 0.1          | 0.0     | 0.0     | 0.0     |
| female thorax     | 117.8   | 0.0     | 0.0          | 0.0     | 0.0     | 0.0     |
| female head       | 152.6   | 0.0     | 0.0          | 0.0     | 0.0     | 0.0     |

**Table S4.** Expression (in fpkm) of Y-linked genes and their close autosomal paralogs.

| Sample            | GK18510 (Y) | GK18077 (A) | GK20591 (Y) | GK19651 (A) | YOgnWI018045 (Y) | GK14595 (A) |
|-------------------|-------------|-------------|-------------|-------------|------------------|-------------|
| male whole body   | 857.2       | 612.5       | 38.9        | 31.2        | 23.4             | 46.6        |
| testis            | 8218.6      | 5664.0      | 390.9       | 209.8       | 209.6            | 310.1       |
| accessory gland   | 9.6         | 6.4         | 0.3         | 0.3         | 0.5              | 0.0         |
| male thorax       | 14.0        | 8.9         | 0.6         | 0.1         | 0.0              | 0.0         |
| male head         | 20.1        | 12.2        | 0.2         | 1.6         | 0.5              | 1.4         |
| female whole body | 0.0         | 0.0         | 0.0         | 0.0         | 0.0              | 0.4         |
| ovary             | 0.4         | 0.3         | 0.1         | 0.0         | 0.0              | 0.0         |
| female thorax     | 0.0         | 0.0         | 0.0         | 0.0         | 0.0              | 0.0         |
| female head       | 0.0         | 0.0         | 0.0         | 0.0         | 0.0              | 0.0         |

Table S5. *D. willistoni* Y-linked pseudogenes.

| <i>D. willistoni</i> functional gene |                       | <i>D. willistoni</i> Y-linked pseudogene |                              | <i>D. melanogaster</i> ortholog <sup>b</sup> |                  |
|--------------------------------------|-----------------------|------------------------------------------|------------------------------|----------------------------------------------|------------------|
| Name                                 | Scaffold <sup>a</sup> | Scaffold <sup>1</sup>                    | Evidence of pseudogenization | Name                                         | Expression       |
| GK20831                              | 4510                  | 1610                                     | no expression                | <i>Roc1a</i>                                 | widespread       |
| GK20808                              | 4510                  | 744                                      | no expression                | <i>CG5819</i>                                | widespread       |
| GK15752                              | 4514                  | 2710                                     | no expression                | <i>CG8701</i>                                | testis           |
| GK15702                              | 4514                  | 4162                                     | no expression                | <i>CG16926</i>                               | widespread       |
| GK15705                              | 4514                  | 1375/4911                                | no expression                | <i>TBCB</i>                                  | embryo / larva   |
| GK15704                              | 4514                  | 4/3948                                   | no expression                | <i>Oseg6</i>                                 | embryo / larva   |
| GK15700                              | 4514                  | 647                                      | no expression                | <i>Ir56d</i>                                 | widespread       |
| GK15874                              | 4514                  | 4635/2143/4911                           | deletions                    | <i>par-1</i>                                 | pupa             |
| GK15875                              | 4514                  | 4911                                     | deletions                    | <i>Rep</i>                                   | widespread       |
| GK15703                              | 4514                  | 9519                                     | deletions                    | <i>hpo</i>                                   | widespread       |
| GK14599/GK14600                      | 4521                  | 10303/12259/13106                        | stop codons                  | <i>Lrr47</i>                                 | ovary            |
| GK18073                              | 4577                  | 4598/1443/778                            | stop codons                  | <i>CG42313</i>                               | embryo           |
| GK18305                              | 4577                  | 4453/2052                                | no expression                | <i>CG3491</i>                                | testis           |
| GK18085                              | 4577                  | 11518                                    | deletions                    | <i>CG32164</i>                               | widespread       |
| GK18304                              | 4577                  | 306/2402                                 | no expression                | <i>CG4701</i>                                | testis           |
| YOgnWI012342                         | 4577                  | 4749                                     | no expression                | <i>Prosβ6</i>                                | widespread       |
| GK18076                              | 4577                  | 338                                      | deletions                    | <i>CG33308</i>                               | testis           |
| YOgnWI012332                         | 4577                  | 4687                                     | stop codons                  | <i>CG33309</i>                               | testis           |
| GK27571                              | 4585                  | 669/1241/6417                            | no expression                | <i>CG18109</i>                               | testis           |
| GK11576                              | 4902                  | 14514                                    | no expression                | <i>CG15186</i>                               | widespread       |
| GK25126                              | 4909                  | 3178/14016                               | no expression                | <i>CG9940</i>                                | widespread       |
| GK24923                              | 4909                  | 1787/4784                                | no expression                | <i>CG4078</i>                                | widespread       |
| GK22673                              | 4921                  | 4544                                     | deletions                    | <i>CG1458</i>                                | widespread       |
| GK22587                              | 4921                  | 3711/2127                                | no expression                | <i>CG32625</i>                               | embryo           |
| GK22615                              | 4921                  | 4753                                     | no expression                | <i>bnk</i>                                   | widespread       |
| GK22587                              | 4921                  | 402                                      | no expression                | <i>CG34283</i>                               | testis           |
| GK28182                              | 4943                  | 2273/676/795                             | no expression                | <i>Osi9</i>                                  | embryo / larva   |
| GK13038                              | 4943                  | 10790/2374/14678                         | no expression                | <i>Osi8</i>                                  | pupa             |
| GK13036                              | 4943                  | 1766/1205/5776                           | no expression                | <i>Osi6</i>                                  | embryo / pupa    |
| GK14206                              | 4943                  | 10032/6949                               | no expression                | <i>Osi11</i>                                 | pupa             |
| GK13044                              | 4943                  | 1946/4878/5852                           | no expression                | <i>Osi12</i>                                 | widespread       |
| GK13035                              | 4943                  | 5128/13128                               | no expression                | <i>Osi5</i>                                  | widespread       |
| GK13153                              | 4943                  | 3173/3481                                | no expression                | <i>Ppi1</i>                                  | testis           |
| GK13155                              | 4943                  | 11089/14856                              | no expression                | <i>Irk2</i>                                  | larva            |
| GK13040                              | 4943                  | 1228/2085                                | no expression                | <i>Osi10</i>                                 | larva/pupa       |
| GK13026                              | 4943                  | 287/3758/4722                            | no expression                | <i>Vha14-2</i>                               | testis           |
| GK18942                              | 4943                  | 4666/4685/429                            | no expression                | <i>CG10177</i>                               | testis           |
| GK13030                              | 4943                  | 4938                                     | deletions                    | <i>CG16898</i><br><i>CG33301</i>             | digestive system |
| GK13037                              | 4943                  | 13467                                    | deletions                    | <i>Osi7</i>                                  | embryo/ pupa     |
| GK26902                              | 4943                  | 5712                                     | deletions                    | <i>CG7208</i><br><i>CG31948</i>              | gonads           |
| GK28338                              | 4943                  | 3990                                     | out of frame indel           | <i>CG7208</i><br><i>CG31948</i>              | gonads           |
| GK18354                              | 4945                  | 6321                                     | deletions                    | <i>E23</i>                                   | larva            |
| YOgnWI027949                         | 4945                  | 8817                                     | no expression                | <i>CG34394</i>                               | larva            |
| GK18364                              | 4945                  | 7938                                     | stop codons                  | <i>l(2)gd1</i>                               | widespread       |
| GK18206                              | 4963                  | 4425/4684                                | no expression                | <i>CG10934</i>                               | testis           |

<sup>a</sup> *D. willistoni* scaffold names are abridged as follows. "CH960481 scf2\_1100000001122" abridged as "1122".

<sup>b</sup> Orthology information taken from FlyBase [12].

**Table S6.** Time of acquisition of genes that retained the autosomal or X-linked original copy. PCR tests are not safe in these cases, so we relied on BlastN searches (see Material and Methods for details). We found that the last three genes (*GK20591*, *YOgnWI018045*, and *GK20618*) were duplicated to the *D. willistoni* Y chromosome after the split between this species and *D. paulistorum* / *D. equinoxialis* (see Figure 3 for the phylogeny of these species). The result of *GK18510* is inconclusive: under a single-event scenario the sister species *D. paulistorum* and *D. equinoxialis* should have been identical, either having many copies (indicating a duplication to the Y chromosome before their split from *D. willistoni*) or only one copy (indicating a duplication after this split). Hence, we can only say that the duplication happened after the split between *D. tropicalis* and the ancestor of the other species.

| Gene                | <i>D. melanogaster</i><br>ortholog | Number of blastN full copies <sup>a</sup> |                                |                                  |                                    |                        |                      |
|---------------------|------------------------------------|-------------------------------------------|--------------------------------|----------------------------------|------------------------------------|------------------------|----------------------|
|                     |                                    | <i>D. willistoni</i><br>Sanger            | <i>D. willistoni</i><br>PacBio | <i>D. willistoni</i><br>Nanopore | <i>D. paulistorum</i> <sup>b</sup> | <i>D. equinoxialis</i> | <i>D. tropicalis</i> |
| <i>GK18510</i>      | <i>ProtA</i>                       | ~ 10                                      | ~ 10                           | ~ 10                             | ~ 10                               | 1                      | 1                    |
| <i>GK20591</i>      | <i>CG6888</i>                      | 2                                         | 2                              | 2                                | 1                                  | 1                      | 1                    |
| <i>YOgnWI018045</i> | <i>CG34175</i>                     | 2                                         | 1 <sup>c</sup>                 | 2                                | 1                                  | 1                      | 1                    |
| <i>GK20618</i>      | <i>Prosβ6</i>                      | 5                                         | 8                              | 6                                | 1                                  | 1                      | 2 <sup>d</sup>       |

<sup>a</sup> BlastN search using the *D. willistoni* Y-linked genes as queries and the listed genomes as the databases.

<sup>b</sup> The two strains of *D. paulistorum* [13] produced identical results.

<sup>c</sup> This result is unexpected, because the Sanger and PacBio assemblies came from the same strain (but with a ~15 years interval). The discrepancy may be caused by an assembly failure in PacBio, or mutation in the *D. willistoni* stock.

<sup>d</sup> Possibly the result of an independent duplication of *Prosβ6* in the *D. tropicalis* lineage [5].

**Table S7.** *D. willistoni* Y-linked genes as represented in successive annotation efforts. Only matches to our final annotation (Supplementary File wilYgenes\_25oct2021\_cds.fasta) that have 100% identity and 100% coverage of are shown.

| Gene         | <i>D. melanogaster</i> ortholog | Copies <sup>a</sup> | Clark <i>et al.</i> 2007 <sup>b</sup> | Yang <i>et al.</i> 2018 <sup>c</sup> | NCBI <sup>d</sup> | Testis RNAseq <sup>e</sup> | Source of final annotation <sup>f</sup> |
|--------------|---------------------------------|---------------------|---------------------------------------|--------------------------------------|-------------------|----------------------------|-----------------------------------------|
| GK21041      | CG18155                         | 1 Y                 |                                       | YotrWI000247                         | XM_023179564.1    | contig5626                 | YotrWI000247                            |
| GK20609      | CG15580                         | 1 Y                 | GK20609                               |                                      |                   | contig3806                 | GK20609                                 |
| GK13929      | CG10588                         | 1 Y                 | GK13929                               |                                      | XM_023177135.1    | contig1847                 | GK13929                                 |
| GK28041      | CG32650                         | 1 Y                 |                                       | YotrWI024144                         | XM_015177028.2    | contig10096                | YotrWI024144                            |
| GK27472      | CG13539                         | 1 Y                 |                                       |                                      |                   | contig11488                | contig11488                             |
| YOgnWI030283 | CG34277                         | 1 Y                 |                                       |                                      |                   | contig10961                | contig10961                             |
| GK21220      | CG6052                          | 1 Y                 |                                       |                                      |                   | contig489                  | contig489                               |
| YOgnWI000172 | CG14339                         | 1 Y                 |                                       |                                      |                   | contig2432                 | contig2432                              |
| GK27406      | Piezo-like                      | 1 Y                 |                                       |                                      |                   | contig223                  | contig223                               |
| GK28211      | Ran-like                        | 1 Y                 |                                       |                                      |                   | contig9500                 | contig9500                              |
| GK18510      | ProtA                           | 10 Y, 1 A           | GK18510                               | YotrWI030169                         | XM_002075936.3    |                            | GK18510                                 |
| GK20591      | CG6888                          | 1 Y, 1 A            | GK20591                               | YotrWI024161                         | XM_002072443.2    | contig14861                | GK20591                                 |
| YOgnWI018045 | CG34175                         | 1 Y, 1 A            |                                       | YotrWI018045                         |                   |                            | YotrWI018045                            |
| GK20619      | Prosβ6                          | 4 Y, 1 A            | GK20619                               | YotrWI000244                         | XM_002060798.1    |                            | GK20619                                 |
| wilProsB6_Y2 | Prosβ6                          | 4 Y, 1 A            |                                       |                                      |                   |                            | PacBio assembly                         |
| wilProsB6_Y3 | Prosβ6                          | 4 Y, 1 A            |                                       |                                      |                   |                            | PacBio assembly                         |
| wilProsB6_Y4 | Prosβ6                          | 4 Y, 1 A            |                                       |                                      |                   |                            | PacBio assembly                         |

<sup>a</sup> The number of copies in the *D. willistoni* genome. The values for GK18510 and wilProsB6\_Y genes are approximate.

<sup>b</sup> Release 1.3, obtained from FlyBase ([http://ftp.flybase.net/genomes/dwil/dwil\\_r1.3\\_FB2008\\_07/fasta/dwil-all-CDS-r1.3.fasta.gz](http://ftp.flybase.net/genomes/dwil/dwil_r1.3_FB2008_07/fasta/dwil-all-CDS-r1.3.fasta.gz)).

<sup>c</sup> Yang *et al.* [2] reported full transcript sequences as gff files (*i.e.*, with 5' and 3' UTRs). We annotated the coding sequences (CDS) comparing them to the *D. melanogaster* orthologs.

<sup>d</sup> NCBI annotations are periodically updated. The data shown was accessed in October 5th 2021.

<sup>e</sup> Accession GJOF01000000. The testis transcriptome contains full transcripts (*i.e.*, with 5' and 3' UTRs). We annotated the coding sequences (CDS) comparing them to the *D. melanogaster* orthologs.

<sup>f</sup> For the sake of simplicity we collated all final cds sequences in a single file (Supplementary File wilYgenes\_25oct2021\_cds.fasta).



**Table S8.** Gene gains and losses in the Y chromosomes of three *Drosophila* species. See Figure S3 for the phylogenetic context.

| Branch | Branch length (Myr) <sup>a</sup> | Gene losses     | Gene gains <sup>b</sup>               | Source     |
|--------|----------------------------------|-----------------|---------------------------------------|------------|
| A-B    | 0.7                              | -               | <i>ARY, CCY</i>                       | [7]        |
| B-wil  | 62.2                             | -               | see Table 1 (14 genes)                | This paper |
| B-mel  | 62.2                             | <i>JY-alpha</i> | <i>WDY, kl-5, Pp1-Y1, Pp1-Y2, FDY</i> | [3,7]      |
| A-vir  | 62.9                             | -               | <i>kl-5, GJ19835, CG11719, CG2964</i> | [3]        |

<sup>a</sup> Branch lengths were taken from ref. [10].<sup>b</sup> The *kl-5* gene was independently gained twice (see Figure 1 of ref. [7]).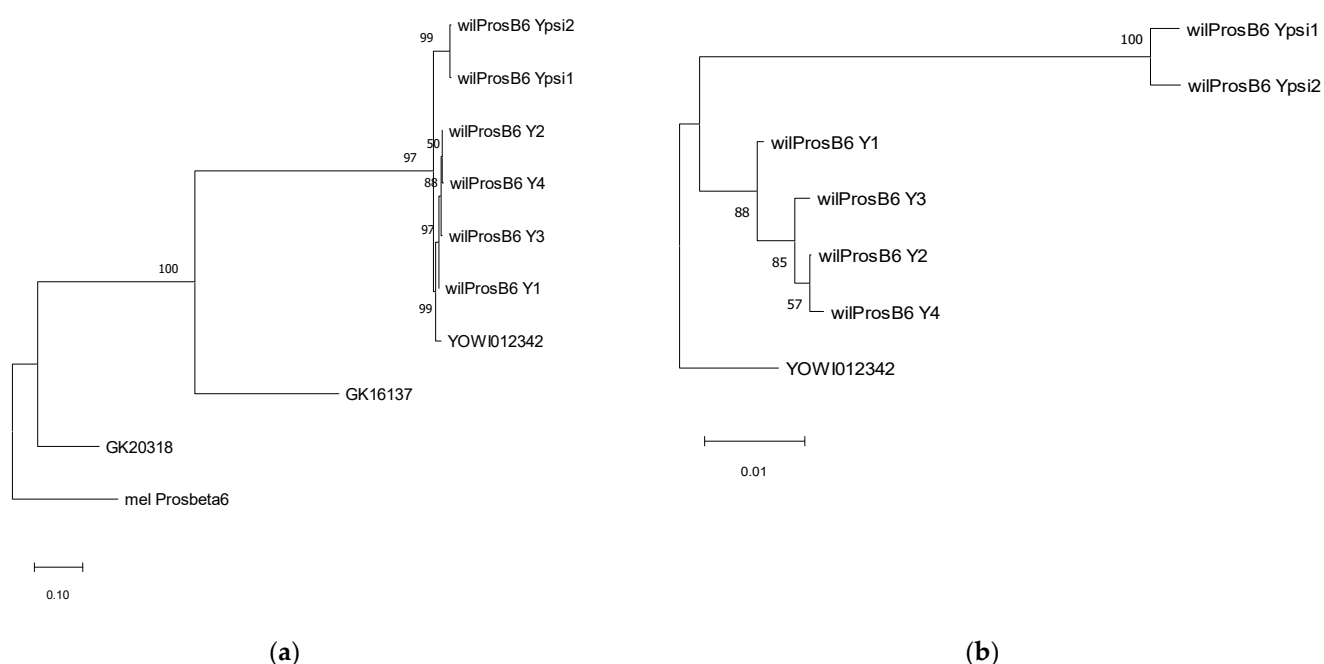**Figure S1.** Phylogeny of the *Prosβ6* gene family in *D. willistoni*. (a) Phylogeny including all *D. willistoni* genes, rooted in *D. melanogaster*. (b) Phylogeny including only the *D. willistoni* Y-linked genes, rooted in the autosomal gene that originated them (*YOgnWI012342*). *D. melanogaster* harbors only one *Prosβ6* gene, which has widespread expression. In contrast, there are seven genes in *D. willistoni*, plus two pseudogenes. The *GK20318* gene has widespread expression, and all others are testis-specific. *GK16137* and *YOgnWI012342* are autosomal; the latter was copied to the Y chromosome as part of a segmental duplication. Once there, it generated four functional genes (labeled as *wilProsB6\_Y1* to *wilProsB6\_Y4*, and two pseudogenes (*wilProsB6\_Ypsi1* and *wilProsB6\_Ypsi2*). These genes and pseudogenes were annotated from the PacBio assembly because the reference Sanger assembly apparently collapsed several copies, and contains only two functional genes: *GK20618* (partial sequence, 100% identity with *wilProsB6\_Y2*) and *GK20619* (100% identical to *wilProsB6\_Y1*). It also includes one pseudogene, *GK22295*, which is a partial sequence with 99% identity with the two pseudogenes annotated in the PacBio assembly. Phylogenies were inferred with the Maximum Likelihood method on the nucleotide sequences and the Tamura 3-parameter model with rate differences among sites modeled by a Gamma distribution. Analyses were performed in MEGA11 [14].

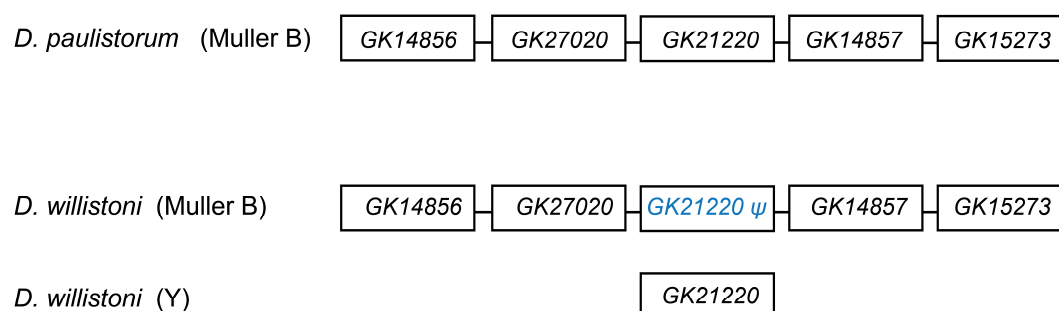

**Figure S2.** Ancestral autosomal location of the Y-linked gene GK21220. BlastN searches with the Y-linked gene GK21220 showed the Y-linked scaffolds (as expected) and a very similar 118 bp match in the autosomal scaffold CH963850 (coordinates 5158275–5158392). The corresponding region in the *D. paulistorum* assembly is autosomal (as expected) and contains the functional ortholog of the GK21220 gene. Hence, the 118 bp region of scaffold CH963850 in the *D. willistoni* genome is a remnant of the original GK21220 gene, which degenerated after its duplication to the Y. We could not find any sign of the flanking genes in the *D. willistoni* Y, either because they were not copied to the Y, or had degenerated beyond recognition.

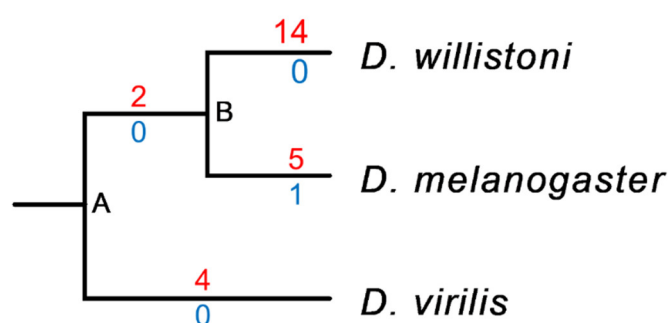

**Figure S3.** Gene gains and losses in Y chromosomes of three *Drosophila* species. The numbers of gene gains are shown above the respective branches in red, and the gene losses are shown in blue. See Table S8 for the list of genes. Nodes are labeled in black.

## References (Supplementary Material)

- Clark, A.G.; Eisen, M.B.; Smith, D.R.; Bergman, C.M.; Oliver, B.; Markow, T.A.; Kaufman, T.C.; Kellis, M.; Gelbart, W.; Iyer, V.N.; et al. Evolution of genes and genomes on the *Drosophila* phylogeny. *Nature* **2007**, *450*, 203–218, doi:10.1038/nature06341.
- Yang, H.; Jaime, M.; Polihronakis, M.; Kanegawa, K.; Markow, T.; Kaneshiro, K.; Oliver, B. Re-annotation of eight *Drosophila* genomes. *Life Sci Alliance* **2018**, *1*, e201800156, doi:10.26508/lsa.201800156.
- Carvalho, A.B.; Clark, A.G. Efficient identification of Y chromosome sequences in the human and *Drosophila* genomes. *Genome Res.* **2013**, *23*, 1894–1907, doi:10.1101/gr.156034.113.
- Carvalho, A.B.; Lazzaro, B.P.; Clark, A.G. Y chromosomal fertility factors *kl-2* and *kl-3* of *Drosophila melanogaster* encode dynein heavy chain polypeptides. *Proc Natl Acad Sci U S A* **2000**, *97*, 13239–13244, doi:10.1073/pnas.230438397.
- Belote, J.; Zhong, L. Duplicated proteasome subunit genes in *Drosophila* and their roles in spermatogenesis. *Heredity* **2009**, *103*, 23–31, doi:10.1038/hdy.2009.23.
- Krsticevic, F.J.; Schrago, C.G.; Carvalho, A.B. Long-read single molecule sequencing to resolve tandem gene copies: The *Mst77Y* region on the *Drosophila melanogaster* Y chromosome. *G3* **2015**, *5*, 1145–1150, doi:10.1534/g3.115.017277.
- Koerich, L.B.; Wang, X.; Clark, A.G.; Carvalho, A.B. Low conservation of gene content in the *Drosophila* Y chromosome. *Nature* **2008**, *456*, 949–951, doi:10.1038/nature07463.
- Carvalho, A.B.; Clark, A.G. Y chromosome of *D. pseudoobscura* is not homologous to the ancestral *Drosophila* Y. *Science* **2005**, *307*, 108–110, doi:10.1126/science.1101675.
- Mahajan, S.; Wei, K.H.; Nalley, M.J.; Gibilisco, L.; Bachtrog, D. De novo assembly of a young *Drosophila* Y chromosome using single-molecule sequencing and chromatin conformation capture. *PLoS Biol* **2018**, *16*, e2006348, doi:10.1371/journal.pbio.2006348.
- Tamura, K.; Subramanian, S.; Kumar, S. Temporal patterns of fruit fly (*Drosophila*) evolution revealed by mutation clocks *Mol Biol Evol* **2004**, *21*, 36–44, doi:10.1093/molbev/msg236.

11. R Core Team. *R: A language and environment for statistical computing*, R Foundation for Statistical Computing: 2021.
12. Larkin, A.; Marygold, S.J.; Antonazzo, G.; Attrill, H.; Dos Santos, G.; Garapati, P.V.; Goodman, J.L.; Gramates, L.S.; Millburn, G.; Strelets, V.B.; et al. FlyBase: updates to the *Drosophila melanogaster* knowledge base. *Nucleic Acids Res* **2021**, *49*, D899–D907, doi:10.1093/nar/gkaa1026.
13. Kim, B.Y.; Wang, J.R.; Miller, D.E.; Barmina, O.; Delaney, E.; Thompson, A.; Comeault, A.A.; Peede, D.; D'Agostino, E.R.; Pelaez, J.; et al. Highly contiguous assemblies of 101 drosophilid genomes. *Elife* **2021**, *10*, doi:10.7554/eLife.66405.
14. Tamura, K.; Stecher, G.; Kumar, S. MEGA11: molecular evolutionary genetics analysis version 11. *Mol Biol Evol* **2021**, *38*, 3022–3027.
